# Supplementary material for: An integrated model of the gross tumor volume of cervical lymph nodes and pretreatment plasma Epstein–Barr virus DNA predicts survival of nasopharyngeal carcinoma in the intensity-modulated radiotherapy era: a big-data intelligence platform-based analysis
Source: PubMed Central journal article supplement — Ther Adv Med Oncol. 2019 Sep 25;11:1758835919877729. doi: 10.1177/1758835919877729 (PMC6763945; doi:10.1177/1758835919877729), 2019-09-25
Supplement: Supplementary_table_S1.pdf [file Supplementary_table_S1.pdf]

**Supplementary Table S1** Multivariable analyses of the prognostic factors for distant metastasis-free survival and overall survival of all patients

| Endpoints                        | Variable                | HR (95% CI)        | <i>P</i> -value |
|----------------------------------|-------------------------|--------------------|-----------------|
| Distant metastasis-free survival | GTVnd                   | 1.945(1.502-2.518) | <0.001          |
|                                  | pre-EBV DNA             | 2.111(1.523-2.928) | <0.001          |
|                                  | gender                  | 1.564(1.115-2.193) | 0.010           |
|                                  | T category <sup>a</sup> | 1.402(1.058-1.858) | 0.019           |
|                                  | N category <sup>a</sup> | 1.909(1.463-2.491) | <0.001          |
| Overall survival                 | GTVnd                   | 1.921(1.520-2.429) | <0.001          |
|                                  | pre-EBV DNA             | 1.809(1.360-2.406) | <0.001          |
|                                  | age                     | 1.597(1.275-2.000) | <0.001          |
|                                  | T category <sup>a</sup> | 1.386(1.068-1.798) | 0.014           |
|                                  | N category <sup>a</sup> | 1.745(1.371-2.221) | <0.001          |

GTVnd, gross tumor volume of cervical lymph node; Pre-EBV DNA, pretreatment plasma pretreatment serum Epstein–Barr virus DNA; IC, induction chemotherapy.

The following parameters were also included in the Cox proportional hazards model by backward elimination: age (>45 vs. ≤45 years), gender (male vs. female), T category (T3–4 vs. T1–2), N category (N2–3 vs. N1), use of chemotherapy (with vs. without), pre-EBV DNA (>2000 vs. ≤2000 copy/mL) and GTVnd (>20 vs. ≤20mL).
